# Supplementary material for: Nutzerorientierte Bedarfsanalyse zum potenziellen Einsatz von Assistenzrobotern in der direkten Pflege
Source: Atypon-hosted journal article supplement (doi:10.1024/1012-5302/a000925), 2022-12-05
Supplement: 1012-5302_a000925_esm3.pdf [file 1012-5302_a000925_esm3.pdf]

---

0% ausgefüllt

Sehr geehrte Studienteilnehmerin, sehr geehrter Studienteilnehmer,

mit diesem Fragebogen möchten wir genauere Informationen zu den Tätigkeiten gewinnen, die wir in den Fokusgruppen gesammelt haben. Sie helfen damit, das Unterstützungspotenzial der Tätigkeiten genauer einschätzen zu können.

Vielen Dank für Ihre Teilnahme am PflKoRo-Projekt!

Ihr PflKoRo Team

Weiter

---

33% ausgefüllt

**1. Wie alt sind Sie?**

- 18-30 Jahre
- 31-40 Jahre
- 41-50 Jahre
- 51-60 Jahre
- >60 Jahre

**2. Wie lange sind Sie seit Abschluss der Ausbildung in der Pflege tätig?**

- <5 Jahre
- 5-10 Jahre
- 11-15 Jahre
- >16 Jahre

**3. Sie sind...?**

- weiblich
- männlich
- divers

**4. Wie groß sind Sie?**

- <160 cm
- 160-170 cm
- 171-180 cm
- 181-190 cm
- >190 cm

**5. In welchem Bereich sind Sie tätig?**

- Normalstation (Klinik)
- Intensivstation (Klinik)
- stationäre Langzeitpflege
- andere, und zwar:

Weiter

67% ausgefüllt

### 6. Wie sehr wünschen Sie sich Unterstützung bei folgenden Tätigkeiten?

Ordnen Sie die folgenden Tätigkeiten so, dass die Tätigkeit ganz oben steht, bei der Sie sich am ehesten Unterstützung wünschen. Je weniger Unterstützung Sie sich bei einer Tätigkeit wünschen, desto weiter unten sollte sie stehen. Sie können die Tätigkeiten mit der Maus in die Felder rechts ziehen.

Bitte denken Sie dabei an Tätigkeiten, bei denen sich die/ der Patient\*in im Bett befindet.

|                                                |                                                                   |                                                     |   |
|------------------------------------------------|-------------------------------------------------------------------|-----------------------------------------------------|---|
| Patient*in drehen für pflegerische Maßnahmen   | Patient*in in Seitenlage stabilisieren für pflegerische Maßnahmen | Bein halten für Wundversorgung/ Kompressionsverband | 1 |
|                                                |                                                                   |                                                     | 2 |
| Arm halten für Wundversorgung/ Verbandswechsel | Patient*in im Sitz stabilisieren (im Bett)                        | Anreichen und Ablegen von Materialien               | 3 |
|                                                |                                                                   |                                                     | 4 |
|                                                |                                                                   |                                                     | 5 |
|                                                |                                                                   |                                                     | 6 |

Falls Sie uns etwas zu Frage 6 mitteilen möchten, hinterlassen Sie Ihren Kommentar bitte hier:

### 7. Wie häufig führen Sie die folgenden Tätigkeiten durch?

Ordnen Sie die folgenden Tätigkeiten so, dass die Tätigkeit ganz oben steht, die Sie am häufigsten durchführen. Je seltener Sie eine Tätigkeit durchführen, desto weiter unten sollte sie stehen. Sie können die Tätigkeiten mit der Maus in die Felder rechts ziehen.

Bitte denken Sie dabei an Tätigkeiten, bei denen sich die/ der Patient\*in im Bett befindet.

|                                                |                                                                   |                                                     |   |
|------------------------------------------------|-------------------------------------------------------------------|-----------------------------------------------------|---|
| Patient*in drehen für pflegerische Maßnahmen   | Patient*in in Seitenlage stabilisieren für pflegerische Maßnahmen | Bein halten für Wundversorgung/ Kompressionsverband | 1 |
|                                                |                                                                   |                                                     | 2 |
| Arm halten für Wundversorgung/ Verbandswechsel | Patient*in im Sitz stabilisieren (im Bett)                        | Anreichen und Ablegen von Materialien               | 3 |
|                                                |                                                                   |                                                     | 4 |
|                                                |                                                                   |                                                     | 5 |
|                                                |                                                                   |                                                     | 6 |

Falls Sie uns etwas zu Frage 7 mitteilen möchten, hinterlassen Sie Ihren Kommentar bitte hier:

**8. Wie viel Zeit benötigen Sie für die folgenden Tätigkeiten?**

Ordnen Sie die folgenden Tätigkeiten so, dass die Tätigkeit ganz oben steht, für die Sie am meisten Zeit benötigen. Je schneller eine Tätigkeit geht, desto weiter unten sollte sie stehen. Sie können die Tätigkeiten mit der Maus in die Felder rechts ziehen.

Bitte denken Sie dabei an Tätigkeiten, bei denen sich die/ der Patient\*in im Bett befindet.

|                                                       |                                                                          |                                                            |   |
|-------------------------------------------------------|--------------------------------------------------------------------------|------------------------------------------------------------|---|
| <b>Patient*in drehen für pflegerische Maßnahmen</b>   | <b>Patient*in in Seitenlage stabilisieren für pflegerische Maßnahmen</b> | <b>Bein halten für Wundversorgung/ Kompressionsverband</b> | 1 |
|                                                       |                                                                          |                                                            | 2 |
| <b>Arm halten für Wundversorgung/ Verbandswechsel</b> | <b>Patient*in im Sitz stabilisieren (im Bett)</b>                        | <b>Anreichen und Ablegen von Materialien</b>               | 3 |
|                                                       |                                                                          |                                                            | 4 |
|                                                       |                                                                          |                                                            | 5 |
|                                                       |                                                                          |                                                            | 6 |

Falls Sie uns etwas zu Frage 8 mitteilen möchten, hinterlassen Sie Ihren Kommentar bitte hier:

Weiter

## **Vielen Dank für Ihre Teilnahme!**

Wir möchten uns ganz herzlich für Ihre Mithilfe bedanken.
